# Supplementary material for: Investigating the potential added value of [18F]FDG-PET/CT in long COVID patients with persistent symptoms: a proof of concept study
Source: PubMed Central journal article supplement (PMC10171287; doi:10.1097/mnm.0000000000001689), 2023-03-24
Supplement: nmc-44-495-s001.pdf [file nmc-44-495-s001.pdf]

Supplementary table A. Results of semi-quantitative analysis in the long COVID group and control group with and without Bonferroni correction.

|                                  | Long COVID<br>(n=13) | Controls<br>(n=25) | p-value,<br>Bonferroni<br>corrected | p-value,<br>without<br>Bonferroni<br>correction |
|----------------------------------|----------------------|--------------------|-------------------------------------|-------------------------------------------------|
| a. carotis communis sinistra TBR |                      |                    |                                     |                                                 |
| - Mean                           | <b>1.06</b>          | <b>0.99</b>        | 4.97                                | <b>0.21</b>                                     |
| - Median                         | 1.04                 | 0.99               |                                     |                                                 |
| - Standard deviation             | 0.16                 | 0.25               |                                     |                                                 |
| - Range                          | 0.69-1.38            | 0.48-1.82          |                                     |                                                 |
| a. carotis communis dextra TBR   |                      |                    |                                     |                                                 |
| - Mean                           | <b>1.04</b>          | <b>1.03</b>        | 21.07                               | <b>0.88</b>                                     |
| - Median                         | 0.98                 | 1.00               |                                     |                                                 |
| - Standard deviation             | 0.18                 | 0.18               |                                     |                                                 |
| - Range                          | 0.81-1.56            | 0.72-1.42          |                                     |                                                 |
| a. subclavia sinistra TBR        |                      |                    |                                     |                                                 |
| - Mean                           | <b>0.91</b>          | <b>0.94</b>        | 11.50                               | <b>0.48</b>                                     |
| - Median                         | 0.84                 | 0.92               |                                     |                                                 |
| - Standard deviation             | 0.16                 | 0.15               |                                     |                                                 |
| - Range                          | 0.73-1.22            | 0.72-1.37          |                                     |                                                 |
| a. subclavia dextra TBR          |                      |                    |                                     |                                                 |
| - Mean                           | <b>0.92</b>          | <b>0.98</b>        | <b>5.24</b>                         | <b>0.22</b>                                     |
| - Median                         | 0.85                 | 0.95               |                                     |                                                 |
| - Standard deviation             | 0.18                 | 0.22               |                                     |                                                 |

|                             |             |             |              |             |
|-----------------------------|-------------|-------------|--------------|-------------|
| - Range                     | 0.71-1.33   | 0.69-1.90   |              |             |
| a. axillaris sinistra TBR   |             |             |              |             |
| - Mean                      | <b>0.88</b> | <b>0.92</b> | <b>16.00</b> | <b>0.67</b> |
| - Median                    | 0.88        | 0.90        |              |             |
| - Standard deviation        | 0.29        | 0.12        |              |             |
| - Range                     | 0.43-1.37   | 0.62-1.21   |              |             |
| a. axillaris dextra TBR     |             |             |              |             |
| - Mean                      | <b>0.79</b> | <b>0.94</b> | <b>0.87</b>  | <b>0.04</b> |
| - Median                    | 0.79        | 0.94        |              |             |
| - Standard deviation        | 0.30        | 0.15        |              |             |
| - Range                     | 0.34-1.35   | 0.67-1.21   |              |             |
| a. vertebralis sinistra TBR |             |             |              |             |
| - Mean                      | <b>0.90</b> | <b>0.85</b> | <b>8.54</b>  | <b>0.36</b> |
| - Median                    | 0.85        | 0.82        |              |             |
| - Standard deviation        | 0.17        | 0.15        |              |             |
| - Range                     | 0.62-1.30   | 0.59-1.23   |              |             |
| a. vertebralis dextra TBR   |             |             |              |             |
| - Mean                      | <b>0.86</b> | <b>0.87</b> | <b>24.00</b> | <b>1.00</b> |
| - Median                    | 0.81        | 0.80        |              |             |
| - Standard deviation        | 0.18        | 0.23        |              |             |
| - Range                     | 0.67-1.39   | 0.54-1.53   |              |             |
| Ascending aorta TBR         |             |             |              |             |
| - Mean                      | <b>1.10</b> | <b>1.06</b> | <b>8.35</b>  | <b>0.35</b> |
| - Median                    | 1.09        | 1.06        |              |             |
| - Standard deviation        | 0.08        | 0.06        |              |             |
| - Range                     | 0.97-1.27   | 0.94-1.23   |              |             |

|                               |             |             |              |             |
|-------------------------------|-------------|-------------|--------------|-------------|
| Aortic arch TBR               |             |             |              |             |
| - Mean                        | <b>1.07</b> | <b>1.06</b> | <b>17.09</b> | <b>0.71</b> |
| - Median                      | 1.08        | 1.02        |              |             |
| - Standard deviation          | 0.08        | 0.11        |              |             |
| - Range                       | 0.92-1.22   | 0.89-1.39   |              |             |
| Pulmonary arteries TBR        |             |             |              |             |
| - Mean                        | <b>1.09</b> | <b>1.08</b> | <b>6.76</b>  | <b>0.28</b> |
| - Median                      | 1.10        | 1.07        |              |             |
| - Standard deviation          | 0.11        | 0.08        |              |             |
| - Range                       | 0.78-1.27   | 0.87-1.27   |              |             |
| Descending aorta TBR          |             |             |              |             |
| - Mean                        | <b>1.06</b> | <b>1.07</b> | <b>23.12</b> | <b>0.96</b> |
| - Median                      | 1.06        | 1.04        |              |             |
| - Standard deviation          | 0.07        | 0.09        |              |             |
| - Range                       | 0.92-1.23   | 0.95-1.31   |              |             |
| Abdominal aorta TBR           |             |             |              |             |
| - Mean                        | <b>1.10</b> | <b>1.09</b> | <b>16.00</b> | <b>0.67</b> |
| - Median                      | 1.06        | 1.07        |              |             |
| - Standard deviation          | 0.19        | 0.12        |              |             |
| - Range                       | 0.87-1.64   | 0.83-1.36   |              |             |
| Glandula parotis sinistra TBR |             |             |              |             |
| - Mean                        | <b>1.34</b> | <b>1.02</b> | <b>5.52</b>  | <b>0.23</b> |
| - Median                      | 1.08        | 1.01        |              |             |
| - Standard deviation          | 0.75        | 0.41        |              |             |
| - Range                       | 0.59-3.32   | 0.34-2.01   |              |             |
| Glandula parotis dextra TBR   |             |             |              |             |

|                                |             |             |              |             |
|--------------------------------|-------------|-------------|--------------|-------------|
| - Mean                         | <b>1.37</b> | <b>1.01</b> | <b>3.35</b>  | <b>0.14</b> |
| - Median                       | 1.20        | 0.99        |              |             |
| - Standard deviation           | 0.78        | 0.43        |              |             |
| - Range                        | 0.63-3.39   | 0.39-2.34   |              |             |
| a. iliaca externa sinistra TBR |             |             |              |             |
| - Mean                         | <b>1.03</b> | <b>1.04</b> | <b>13.41</b> | <b>0.56</b> |
| - Median                       | 1.04        | 1.04        |              |             |
| - Standard deviation           | 0.24        | 0.19        |              |             |
| - Range                        | 0.70-1.76   | 0.81-1.79   |              |             |
| a. iliaca externa dextra TBR   |             |             |              |             |
| - Mean                         | <b>0.95</b> | <b>1.05</b> | <b>3.35</b>  | <b>0.14</b> |
| - Median                       | 0.91        | 1.02        |              |             |
| - Standard deviation           | 0.22        | 0.16        |              |             |
| - Range                        | 0.55-1.31   | 0.82-1.43   |              |             |
| a. femoralis sinistra TBR      |             |             |              |             |
| - Mean                         | <b>1.04</b> | <b>0.93</b> | <b>9.75</b>  | <b>0.41</b> |
| - Median                       | 0.95        | 0.95        |              |             |
| - Standard deviation           | 0.25        | 0.19        |              |             |
| - Range                        | 0.83-1.84   | 0.59-1.32   |              |             |
| a. femoralis dextra TBR        |             |             |              |             |
| - Mean                         | <b>1.00</b> | <b>0.98</b> | <b>18.20</b> | <b>0.76</b> |
| - Median                       | 0.98        | 0.96        |              |             |
| - Standard deviation           | 0.20        | 0.26        |              |             |
| - Range                        | 0.72-1.46   | 0.43-1.67   |              |             |
| a. tibialis sinistra TBR       |             |             |              |             |
| - Mean                         | <b>1.02</b> | 0.93        | <b>13.50</b> | <b>0.56</b> |

|                                 |             |             |              |             |
|---------------------------------|-------------|-------------|--------------|-------------|
| - Median                        | 0.99        | 0.96        |              |             |
| - Standard deviation            | 0.29        | 0.15        |              |             |
| - Range                         | 0.61-1.86   | 0.66-1.12   |              |             |
| a. tibialis dextra TBR          |             |             |              |             |
| - Mean                          | <b>0.99</b> | 0.96        | <b>11.69</b> | <b>0.49</b> |
| - Median                        | 0.91        | 0.99        |              |             |
| - Standard deviation            | 0.29        | 0.18        |              |             |
| - Range                         | 0.68-1.92   | 0.59-1.26   |              |             |
| Liver TBR                       |             |             |              |             |
| - Mean                          | <b>1.47</b> | <b>1.34</b> | <b>0.18</b>  | <b>0.01</b> |
| - Median                        | 1.46        | 1.33        |              |             |
| - Standard deviation            | 0.12        | 0.11        |              |             |
| - Range                         | 1.26-1.66   | 1.13-1.56   |              |             |
| m. brachioradialis sinistra TBR |             |             |              |             |
| - Mean                          | <b>0.49</b> | <b>0.48</b> | <b>14.59</b> | <b>0.61</b> |
| - Median                        | 0.44        | 0.41        |              |             |
| - Standard deviation            | 0.14        | 0.23        |              |             |
| - Range                         | 0.35-0.79   | 0.28-1.25   |              |             |
| m. brachioradialis dextra TBR   |             |             |              |             |
| - Mean                          | <b>0.49</b> | <b>0.47</b> | <b>18.20</b> | <b>0.76</b> |
| - Median                        | 0.40        | 0.46        |              |             |
| - Standard deviation            | 0.16        | 0.11        |              |             |
| - Range                         | 0.31-0.78   | 0.33-0.75   |              |             |
